# Supplementary material for: How to Survive 33 min after the Umbilical of a Saturation Diver Severed at a Depth of 90 msw?
Source: MDPI journal article supplement (doi:10.3390/healthcare10030453), 2022-02-28
Supplement: s1 [file s1]

**Table S1.** Breathing volume per minute from severing of the umbilical until the rescue into diving bell.

| Elapsed Time | Time    | Breathing Volume per minute | Total Gas Consumption | Comments                                                                                                        |
|--------------|---------|-----------------------------|-----------------------|-----------------------------------------------------------------------------------------------------------------|
| [min]        | [hh:mm] | [L/min]                     | [barL]                |                                                                                                                 |
| 0:00         | 22:13   |                             | 0                     | Umbilical severed "... I was touched by panic" (MVV at amb. cond)                                               |
| 0:01         | 22:14   | 75                          | 754                   | First minute hyperventilation "... I was touched by panic" → MVV short termed 75.4 l/min (MVV at ambient cond.) |
| 0:02         | 22:15   | 53                          | 1282                  | Very heavy work → 60 L/min                                                                                      |
| 0:03         | 22:16   | 53                          | 1810                  | Still very heavy work → 52.8 L/min (long term MVV!)                                                             |
| 0:04         | 22:17   | 47                          | 2276                  | Arrived at platform - calms down → 46.6 L/min (heavy work)                                                      |
| 0:05         | 22:18   | 47                          | 2742                  | Remains at 46.6 L/min                                                                                           |
| 0:06         | 22:19   | 40                          | 3142                  | Calming down → Gas consumption decreases                                                                        |
| 0:07         | 22:20   | 40                          | 3542                  | Calming down → Gas consumption decreases                                                                        |
| 0:08         | 22:21   | 35                          | 3889                  | Increasingly calming down "... a quiet resignation came over me" → 34.7 L/min                                   |
| 0:09         | 22:22   | 35                          | 4236                  | Remains at 34.7 L/min                                                                                           |

|      |       |    |      |                                                                                |
|------|-------|----|------|--------------------------------------------------------------------------------|
| 0:10 | 22:23 | 35 | 4583 | Remains at 34.7 L/min                                                          |
| 0:11 | 22:24 | 32 | 4903 | Getting even more quiet 32 L/min                                               |
| 0:12 | 22:25 | 32 | 5223 | Still 32.7 m/min – 5700 L Heliox consumed by now → progressive cooling-down!!! |
| 0:13 | 22:26 | 25 | 5473 | Breath becomes flatter 25 L/min                                                |
| 0:14 | 22:27 | 20 | 5673 | ... even flatter → 20 L/min                                                    |
| 0:15 | 22:28 | 13 | 5803 | Breath becomes increasingly flatter 16 L/min                                   |
| 0:16 | 22:29 | 13 | 5933 | "I felt it come - and then ...nothing" → 13 L/min                              |
| 0:17 | 22:30 | 10 | 6033 | Initiating unconsciousness due to core temperature drop → 10 L/min             |
| 0:18 | 22:31 | 5  | 6083 | Ongoing unconsciousness → max. 5 L/min – Thus, ROV sees no gas bubbles         |
| 0:19 | 22:32 | 5  | 6133 | Ongoing unconsciousness → max. 5 L/min                                         |
| 0:20 | 22:33 | 5  | 6183 | Ongoing unconsciousness → max. 5 L/min                                         |

|      |       |   |      |                                              |
|------|-------|---|------|----------------------------------------------|
| 0:21 | 22:34 | 5 | 6233 | Ongoing<br>unconsciousness →<br>max. 5 L/min |
| 0:22 | 22:35 | 5 | 6283 | Ongoing<br>unconsciousness →<br>max. 5 L/min |
| 0:23 | 22:36 | 5 | 6333 | Ongoing<br>unconsciousness →<br>max. 5 L/min |
| 0:24 | 22:37 | 5 | 6383 | Ongoing<br>unconsciousness →<br>max. 5 L/min |
| 0:25 | 22:38 | 5 | 6433 | Ongoing<br>unconsciousness →<br>max. 5 L/min |
| 0:26 | 22:39 | 5 | 6483 | Ongoing<br>unconsciousness →<br>max. 5 L/min |
| 0:27 | 22:40 | 5 | 6533 | Ongoing<br>unconsciousness →<br>max. 5 L/min |
| 0:28 | 22:41 | 5 | 6583 | Ongoing<br>unconsciousness →<br>max. 5 L/min |
| 0:29 | 22:42 | 5 | 6633 | Ongoing<br>unconsciousness →<br>max. 5 L/min |
| 0:30 | 22:43 | 5 | 6683 | Ongoing<br>unconsciousness →<br>max. 5 L/min |
| 0:31 | 22:44 | 5 | 6733 | Ongoing<br>unconsciousness →<br>max. 5 L/min |

|      |       |   |      |                                                                                          |
|------|-------|---|------|------------------------------------------------------------------------------------------|
| 0:32 | 22:45 | 5 | 6783 | Ongoing<br>unconsciousness →<br>max. 5 L/min                                             |
| 0:33 | 22:46 | 5 | 6833 | Ongoing<br>unconsciousness →<br>max. 5 L/min - Rescued<br>into the bell. He<br>breathes! |
